# Supplementary material
Source: publisher figshare collection journal article supplement (https://acs.figshare.com/ndownloader/files/4190662)

**Supplementary material & captions:**

**Figure F1:** GC-MS chromatogram of 1,2 dichlorobenzene before ozonation.

**Figure F2:** GC-FID chromatogram of product mixture.

**Figure F3:** GC-MS chromatogram of product mixture.

**Figure F4:** IR spectrum of 3,4 dichloro-5-hydroxy-2(5H)-furanone.

**Figure F5:**  $^1\text{H}$  NMR spectrum of 3,4 dichloro-5-hydroxy-2(5H)-furanone.

**Figure F6:** Mass spectrum of 3,4 dichloro-5-hydroxy-2(5H)-furanone.

**Figure F7:**  $^1\text{H}$  NMR spectrum of mucochloric acid

**Figure F8:** Mass spectrum of mucochloric acid

**Figure S1. : XRD spectra**

**a & b:** 1 % Ni and 5 % Ni on  $\text{Al}_2\text{O}_3$  support;

**c & d:** 1 % Ni and 5 % Ni on  $\text{SiO}_2$  support;

**e & f:** 1 % Ni and 5 % Ni on  $\text{TiO}_2$  support.

**Figure F1:**

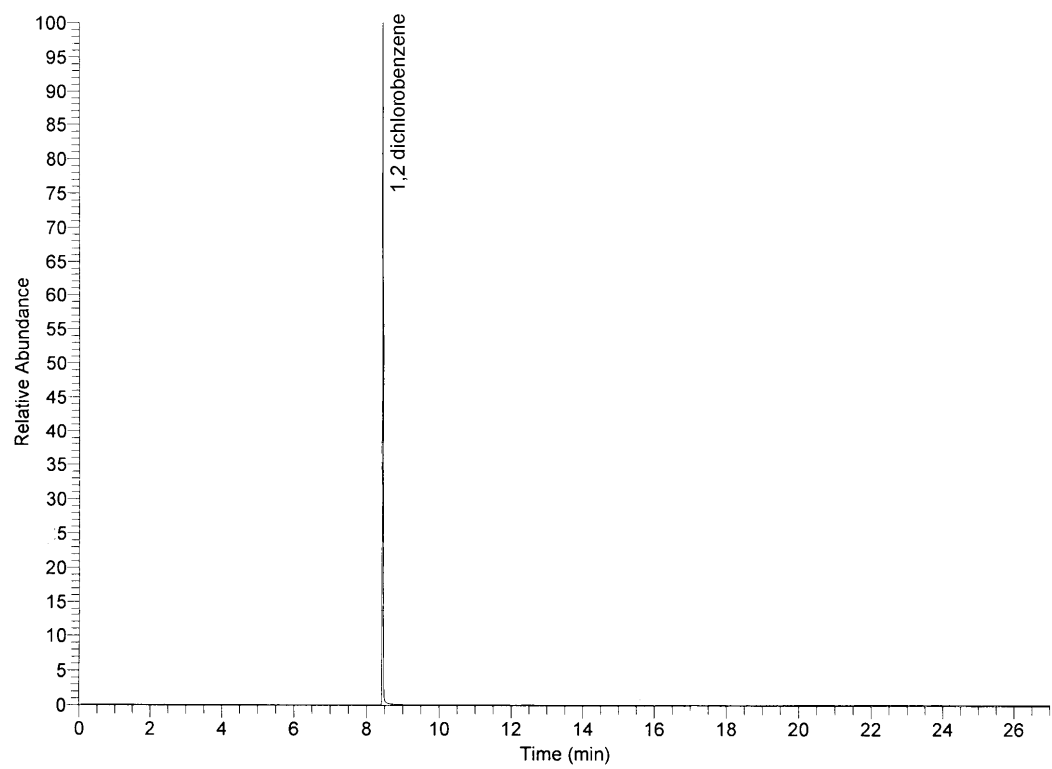

**Figure F2:**

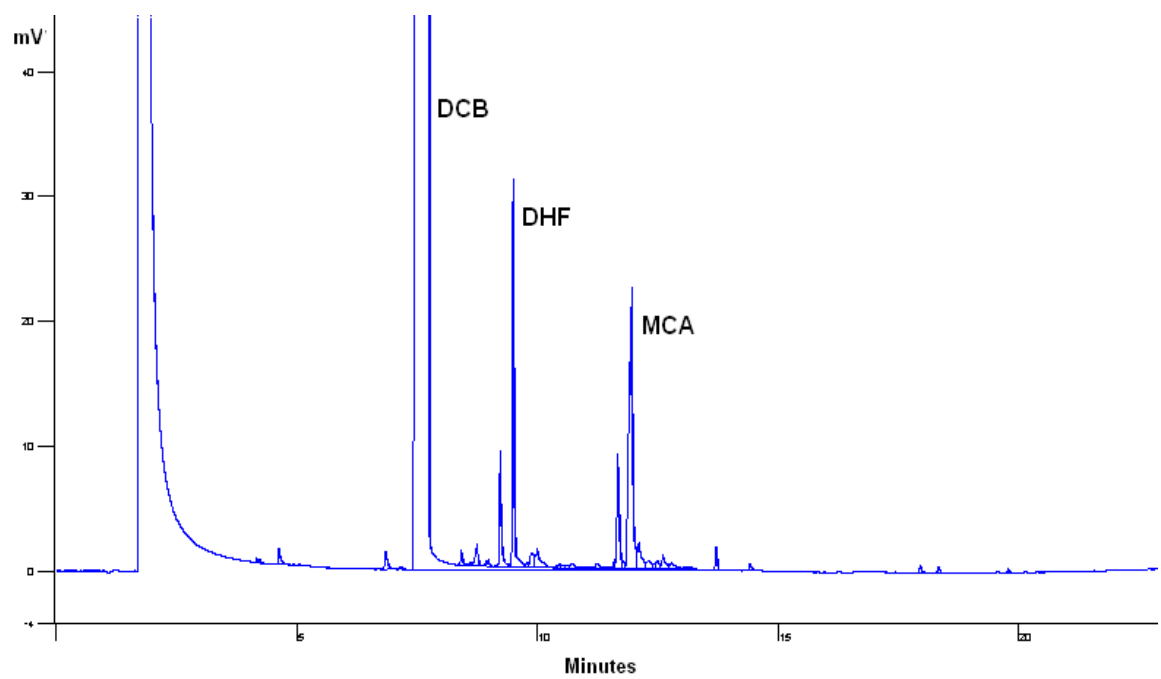

Figure F3:

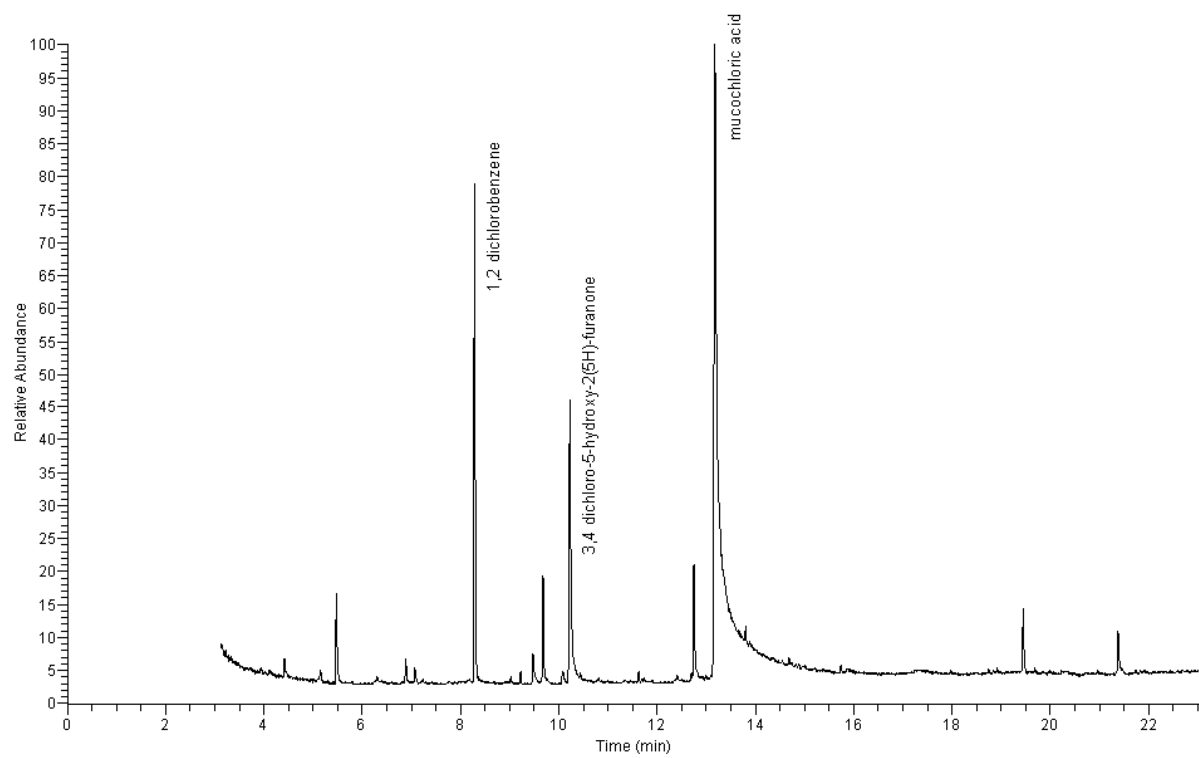

**Figure F4:**

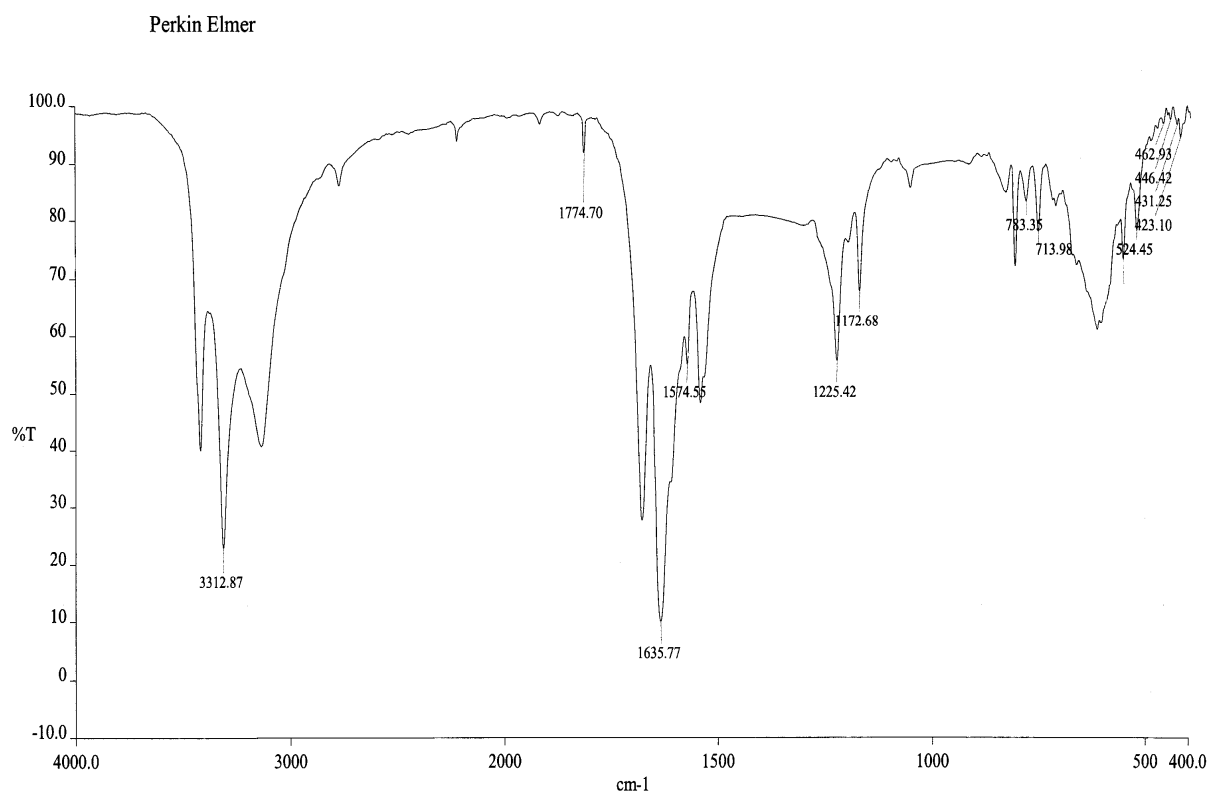

**Figure F5:**

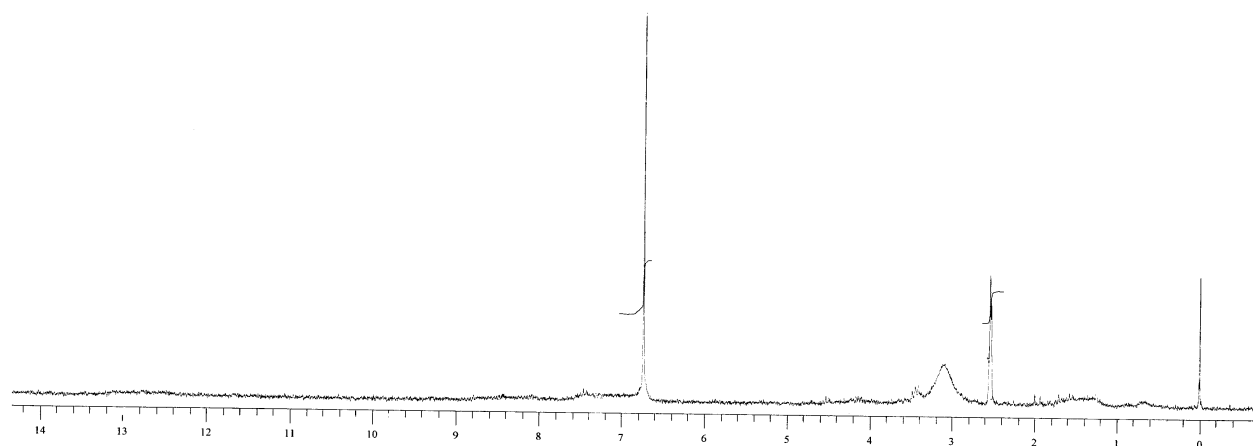

**Figure F6:**

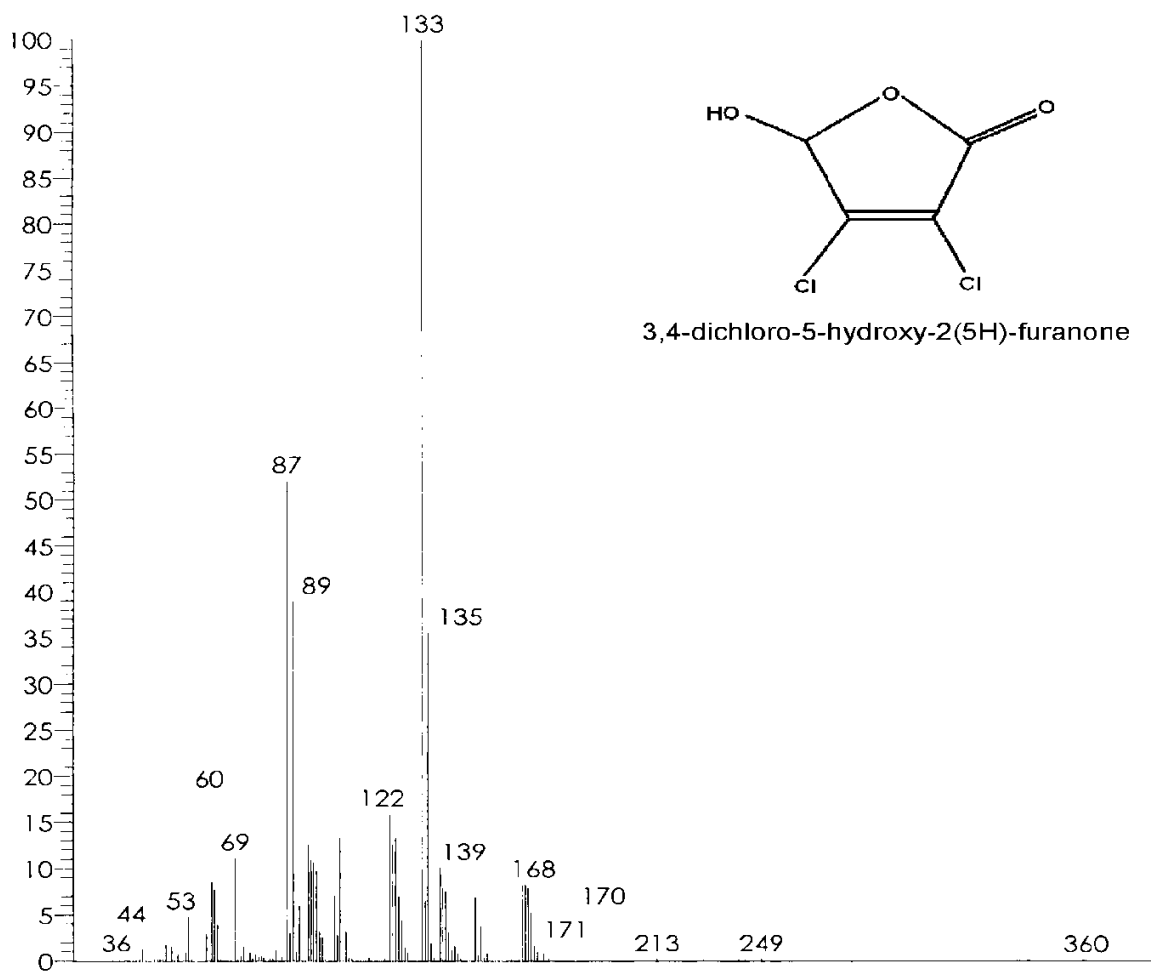

**Figure F7:**

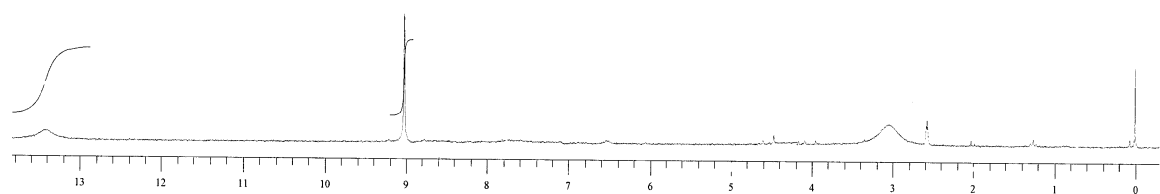



**Figure F8:**

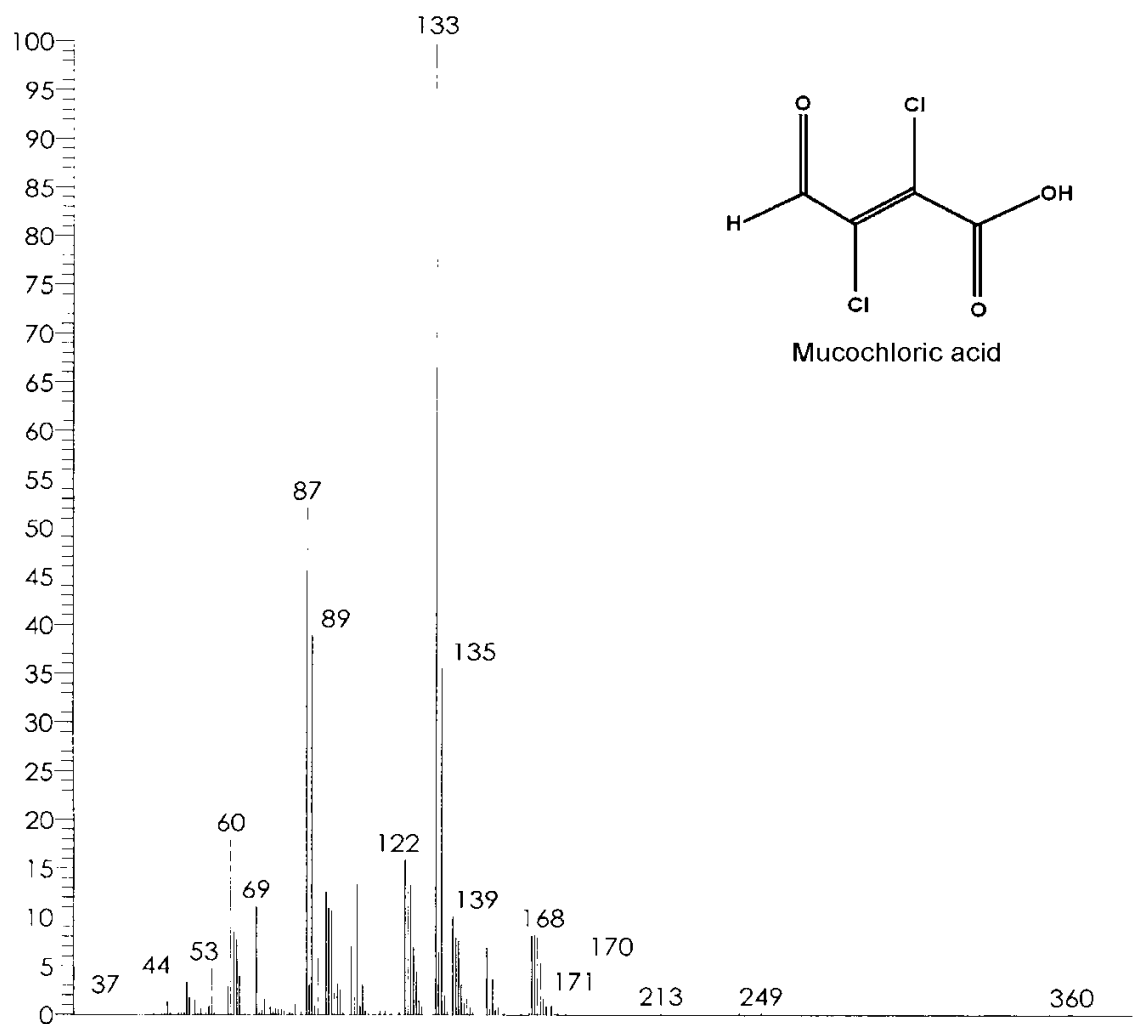

**Figure. S1. :**

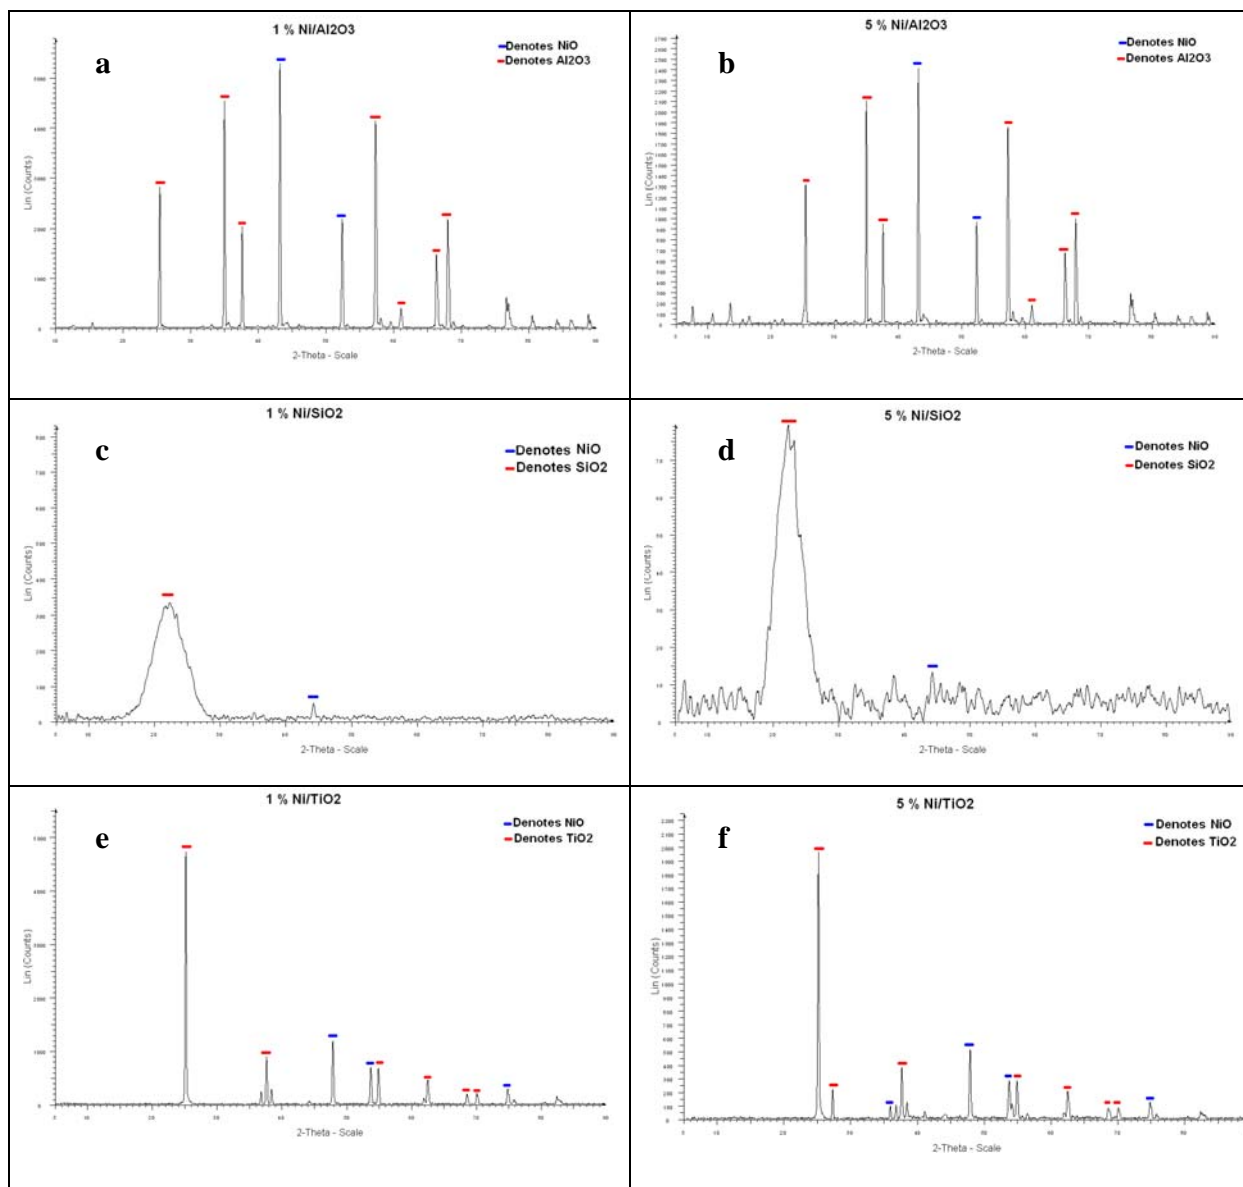

Supplement: Supplementary file 1 [file 4190662]
